# Supplementary material for: The Role and Contributions of Nurses in Stroke Rehabilitation Units: An Integrative Review
Source: PubMed Central journal article supplement — West J Nurs Res. 2023 Jun 5;45(8):764–76. doi: 10.1177/01939459231178495 (PMC10399098; doi:10.1177/01939459231178495), 2023-06-05
Supplement: sj-pdf-1-wjn-10.1177_01939459231178495.pdf [file sj-pdf-1-wjn-10.1177_01939459231178495.pdf]

## Appendix A

### MEDLINE (Ovid) Search Strategy

|     |                                                                                    |
|-----|------------------------------------------------------------------------------------|
| 1.  | stroke rehabilitation/ or rehabilitation/                                          |
| 2.  | ((stroke or geriatric) adj5 rehabilitation).tw,kf.                                 |
| 3.  | 1 or 2                                                                             |
| 4.  | rehabilitation nursing/                                                            |
| 5.  | nurse's role/                                                                      |
| 6.  | exp nurses/ or nursing staff/                                                      |
| 7.  | evidence-based nursing/                                                            |
| 8.  | ((nurse* or nursing) adj5 (role or practice or contribution* or function*)).tw,kf. |
| 9.  | 4 or 5 or 6 or 7 or 8                                                              |
| 10. | exp stroke/                                                                        |
| 11. | geriatrics/                                                                        |
| 12. | health services for the aged/                                                      |
| 13. | exp aged/                                                                          |
| 14. | aging/                                                                             |
| 15. | (stroke or geriatric*).tw,kf.                                                      |
| 16. | 10 or 11 or 12 or 13 or 14 or 15                                                   |
| 17. | (inpatient adj5 rehabilitation).tw,kf.                                             |
| 18. | 3 and 9 and 16 and 17                                                              |
| 19. | 3 and 9 and 16                                                                     |
